# Supplementary material for: Sub-morbid dehydration-associated glomerular hyperfiltration: An emerging reality?
Source: PubMed Central journal article supplement — Kidney Res Clin Pract. 2019 Jun 30;38(2):196–204. doi: 10.23876/j.krcp.18.0147 (PMC6577221; doi:10.23876/j.krcp.18.0147), 2019-06-30
Supplement: krcp-38-196_Supple.pdf [file krcp-38-196_Supple.pdf]

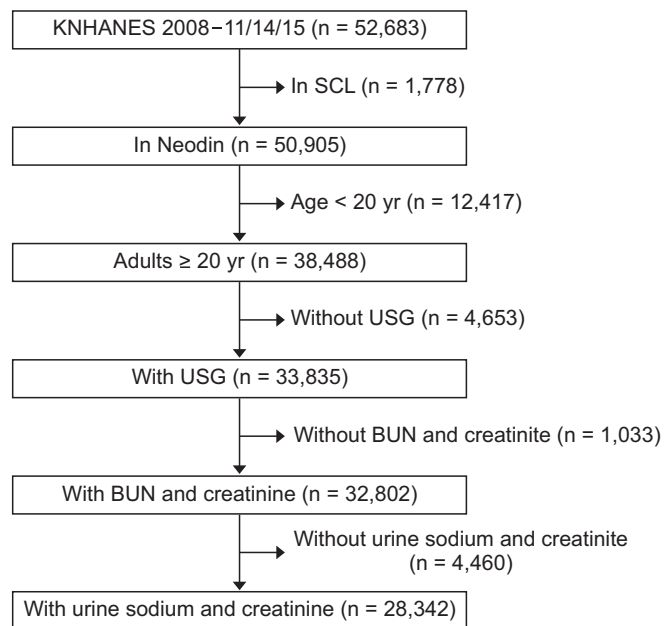

**Supplementary Figure 1. Flow chart of participant selection.**

BUN, blood urea nitrogen; KNHANES, Korea National Health and Nutrition Examination Survey; Neodin, Neodin Medical Institute Central Laboratory; SCL, Seoul Clinical Laboratories; USG, urine specific gravity.

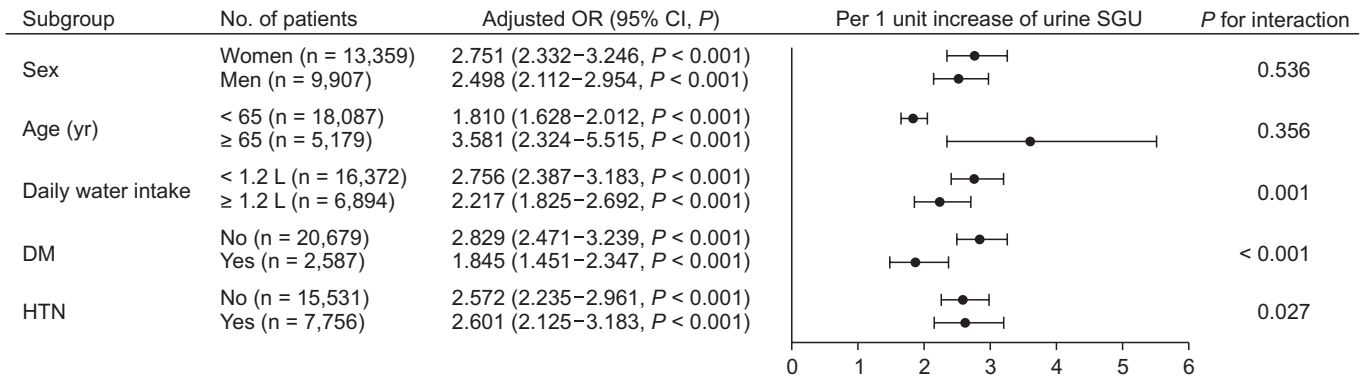

**Supplementary Figure 2. Subgroup analysis.**

CI, confidence interval; DM, diabetes mellitus; HTN, hypertension; OR, odds ratio; SGU, specific gravity unit.

**Supplementary Table 1.** Factors associated with high urine specific gravity unit (SGU)

|                                                  | Adjusted OR (95% CI) | <i>P</i> value |
|--------------------------------------------------|----------------------|----------------|
| Age (per 1 yr increase)                          | 1.021 (1.017–1.026)  | < 0.001        |
| Male sex (yes vs. no)                            | 0.576 (0.516–0.642)  | < 0.001        |
| Current smoker (yes vs. no)                      | 0.789 (0.702–0.888)  | < 0.001        |
| Frequent drinker (yes vs. no)                    | 1.052 (0.944–1.174)  | 0.360          |
| Regular walking (yes vs. no)                     | 1.107 (1.006–1.217)  | 0.036          |
| Cardiovascular disease (yes vs. no)              | 0.734 (0.581–0.929)  | 0.010          |
| Waist circumference (per 1 cm increase)          | 1.009 (1.005–1.014)  | < 0.001        |
| Systolic BP (per 1 mmHg increase)                | 0.995 (0.991–1.000)  | 0.029          |
| Diastolic BP (per 1 mmHg increase)               | 1.003 (0.997–1.009)  | 0.319          |
| Pulse rate (per 1 count/min increase)            | 0.995 (0.991–1.000)  | 0.050          |
| Diabetes (yes vs. no)                            | 2.388 (2.063–2.764)  | < 0.001        |
| Dyslipidemia (yes vs. no)                        | 1.050 (0.936–1.177)  | 0.407          |
| eGFR (per 1 mL/min/1.73 m <sup>2</sup> increase) | 1.032 (1.028–1.037)  | < 0.001        |
| Proteinuria (yes vs. no)                         | 1.342 (0.893–2.017)  | 0.156          |
| High water intake (yes vs. no)                   | 0.839 (0.762–0.924)  | < 0.001        |
| Urine sodium (per 1 mmol/L increase)             | 1.015 (1.014–1.016)  | < 0.001        |
| Urine creatinine (per 1 mmol/L increase)         | 1.512 (1.494–1.530)  | < 0.001        |

High urine SGU was defined as the highest quartile of urine SGU ( $\geq 2.2$ ).

BP, blood pressure; CI, confidence interval; eGFR, estimated glomerular filtration rate; OR, odds ratio.

Adjusted OR and 95% CI were analyzed using multivariate logistic regression analysis with all of the above covariates.
